# Supplementary material for: Diagnostic utility of antigen detection rapid diagnostic tests for Covid-19: a systematic review and meta-analysis
Source: Springer Nature journal article supplement (doi:10.1186/s13000-022-01215-6), 2022-04-12
Supplement: MOESM2 [file 20309868]

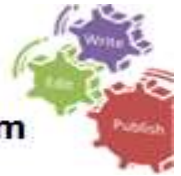

## EDITORIAL CERTIFICATE LETTER

---

This document is to certify that the manuscript listed below was edited for proper English language, grammar, punctuation, spelling, and overall style by one of the highly qualified subject-expert native English speaking editors at **NativeEnglishEdit.com**

The substantive content of the article mentioned below remains the full responsibility of the author/authors:

TITLE OF ARTICLE:

DIAGNOSTIC UTILITY OF ANTIGEN DETECTION RAPID DIAGNOSTIC TESTS FOR COVID- 19: A SYSTEMATIC REVIEW AND META-ANALYSIS

AUTHOR(S):

SOMAYEH GHASEMI, NARGES NAZARI HARMOOSHI, FAKHER RAHIM

REFER CODE:

250H EE-2022-333318335-MINA.EBRAHIMI271-2613 MED

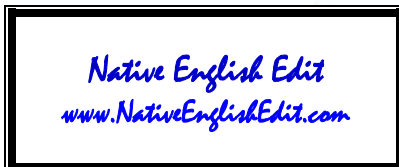

---

Documents receiving this certification should be English-ready for publication; however, the author has the ability to accept or reject our suggestions and changes.

This certificate may be verified at:

[www.NativeEnglishEdit.com](http://www.NativeEnglishEdit.com)

London

East End Road 27, N 3 3QT

United Kingdom
